# Supplementary material for: eduSPIM: Light Sheet Microscopy in the Museum
Source: PLOS journal article supplement (doi:10.1371/journal.pone.0161402), 2016-08-25
Supplement: S1 (10.1371/journal.pone.0161402.s001) [file journal.pone.0161402.s001]

# S1 Text. Instructions for building an eduSPIM

Wiebke Jahr<sup>1,\*</sup>, Benjamin Schmid<sup>1</sup>, Michael Weber<sup>1</sup>, Jan Huiskens<sup>1,\*</sup>

<sup>1</sup> Max Planck Institute of Molecular Cell Biology and Genetics, 01307 Dresden, Germany

\* jahr@mpi-cbg.de, huiskens@mpi-cbg.de

## Instructions for building an eduSPIM

This supplementary file provides the information needed for building an eduSPIM using the Thorlabs 30 mm cage system and optics with a diameter of 1 inch. For the sake of this instruction, we consider three main assembly groups: (i) the illumination arm, (ii) the detection arm and (iii) the sample control unit (stage). Illustrated, step-by-step instructions for each group are given in supplementary Figures 1 – 5. For each step, a schematic of the setup including the beam path is shown on the left and a to-scale line drawing of the actual components is shown on the right. A detailed list of parts is given in Table 1. The *.step*, *.igs* and *.sldprt* files for the whole system are provided in additional supplements and include the information for all homebuilt adaptors and the cuvette mounting stage.

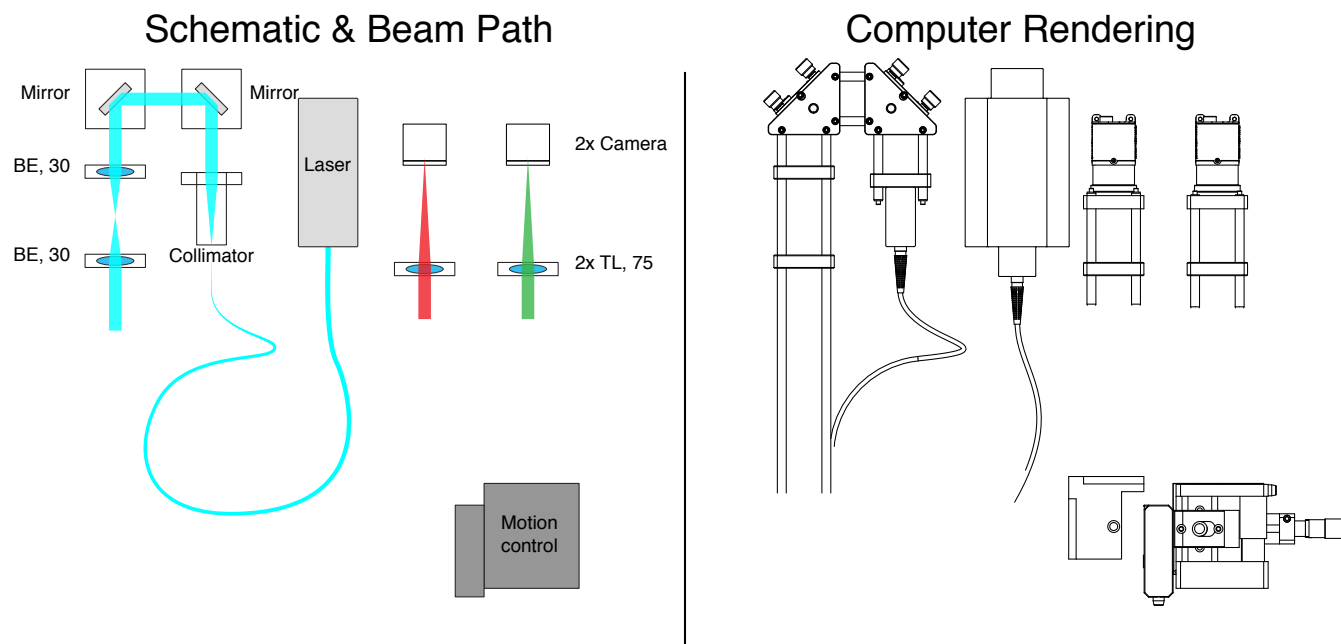

**Figure 1.**

- General

- When assembling the cage system, use some additional cage plates with large aperture (CP03/M) to stabilize the cage. Use these plates to elevate the whole cage structure on 50 mm posts.
- Assemble the homebuilt corner piece that will be used later to connect illumination and detection arm and mount it on a 25 mm post (only shown in the computer rendering).

- Illumination

- Mount the laser on the breadboard and place the fibre in the collimator.
- Place the collimator in the customized cage plate and adjust laser collimation.
- Mount the two alignment mirrors and align the laser beam to go through the centre of the cage system.
- Mount the two lenses of the telescope (BE, both 30 mm). In principle, the telescope could be used to change the beam diameter (magnifying or demagnifying). Here, the 1:1 telescope is just used to collimate the beam more precisely.

- Detection

- Mount the cameras in the cage system using C-mount SM-1 adaptors and SM-1 tubes.
- Mount the tube lenses (TL, 75 mm).
- Adjust the camera/tube lens distance by imaging an “infinitely” far away object (e.g. a structure outside the window) onto the camera chip. For the infinity corrected detection objective, this is the correct distance.

- Stage

- mount the manual linear stage (for adjusting  $x$ -position of the sample) on the breadboard.
- mount the two motorized stages (for  $z$ - and  $y$ -direction) on the manual stage.

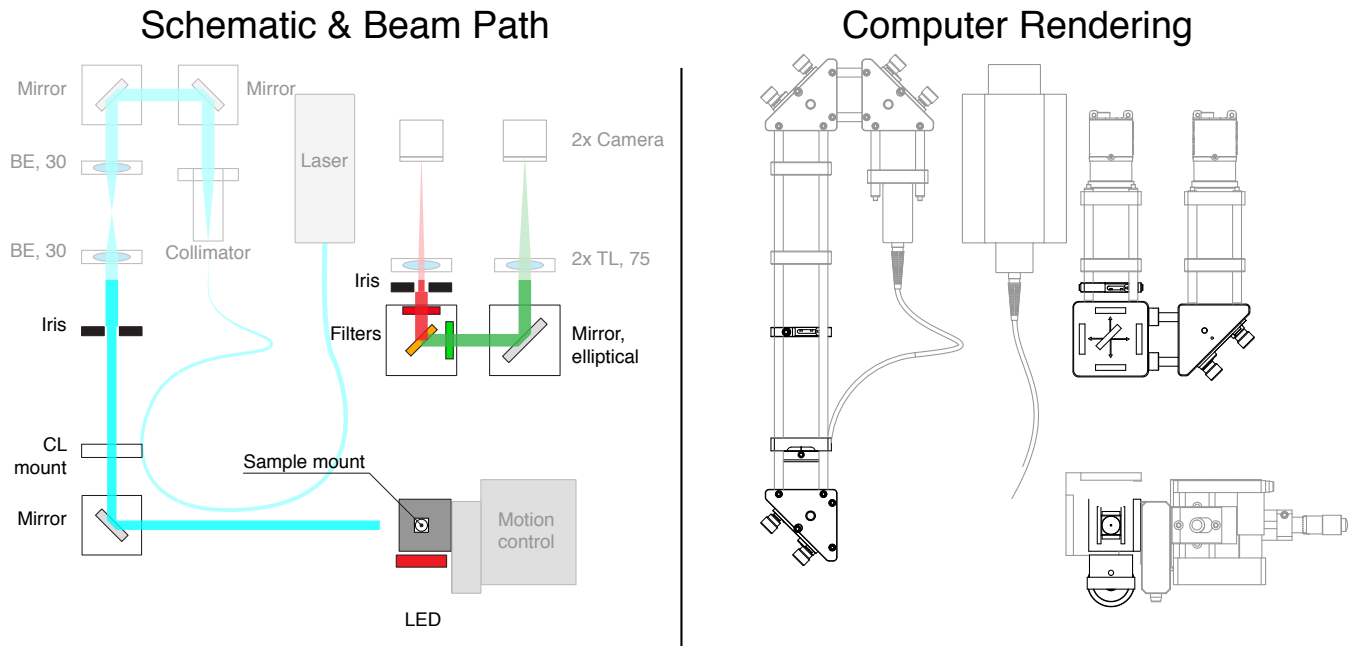

**Figure 2.**

- Illumination
  - Mount the iris and the empty rotational mount for the cylindrical lens (CL mount) in the cage system. The iris can be used to adjust the light sheet thickness by cropping the beam. The cylindrical lens will be placed later.
  - Mount the mirror and align the beam to go through the centre of the cage system. The mirror will be used later to focus the light sheet image onto the camera chip.
- Detection
  - Mount the elliptical mirror into the cage for the fluorescence camera.
  - Mount the iris onto the cage for the transmission camera. It is used to increase the depth of field of the transmission image.
  - Mount the filter cube and connect the cage system of the transmission and fluorescence detection arms.
- Stage
  - Mount the adaptors for holding the cuvette onto the motorized stages and place the cuvette containing a sample.
  - Mount the red transmission LED on the breadboard.

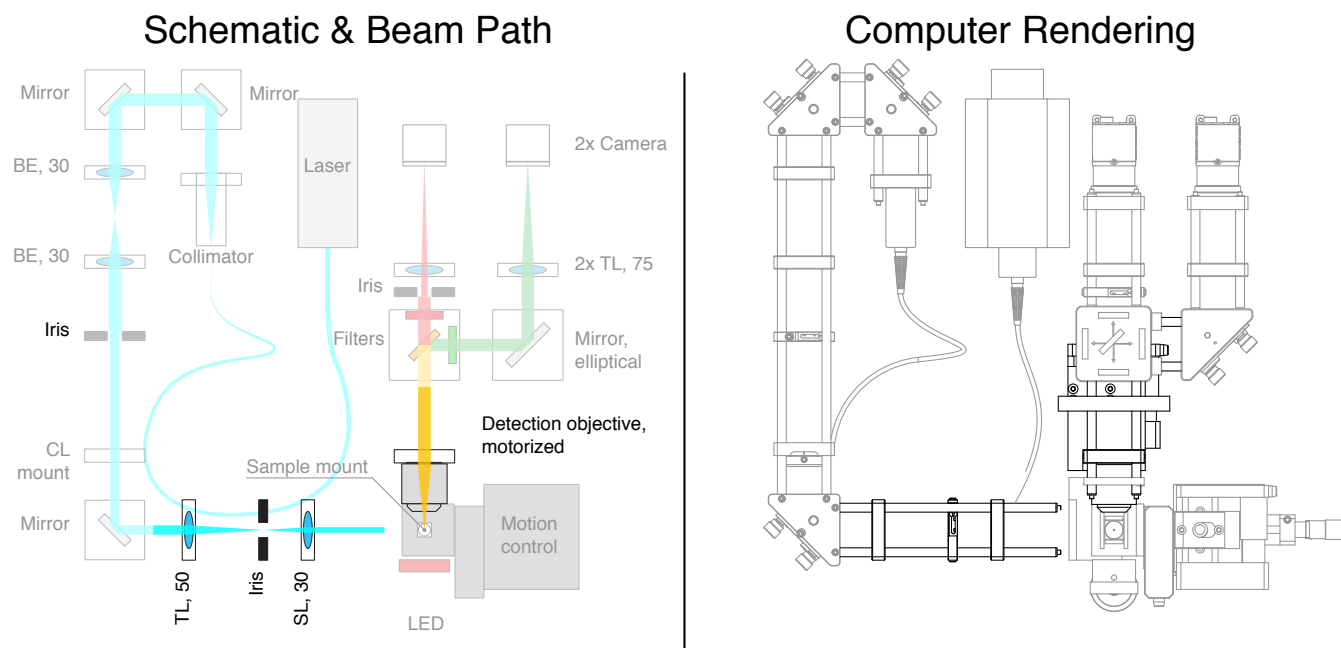

**Figure 3.**

- Illumination

- Place the tube lens (TL, 50 mm) in the cage system and adjust it until the mirror is in its back focal plane.
- Mount the iris in the focal plane of the tube lens. The iris will be used to crop the light sheet height to the size of the camera chip and to prevent bleaching of sample regions that are not imaged.
- Place the scan lens (SL, 30 mm) and align until the beam is collimated.

- Detection

- Place the motorized detection objective in the cage system and slide the detection arm into the home built corner piece connecting the illumination and detection arm.
- Using transmission light, adjust the distance of the whole detection arm to the cuvette until you get a sharp image of the centre of the sample.

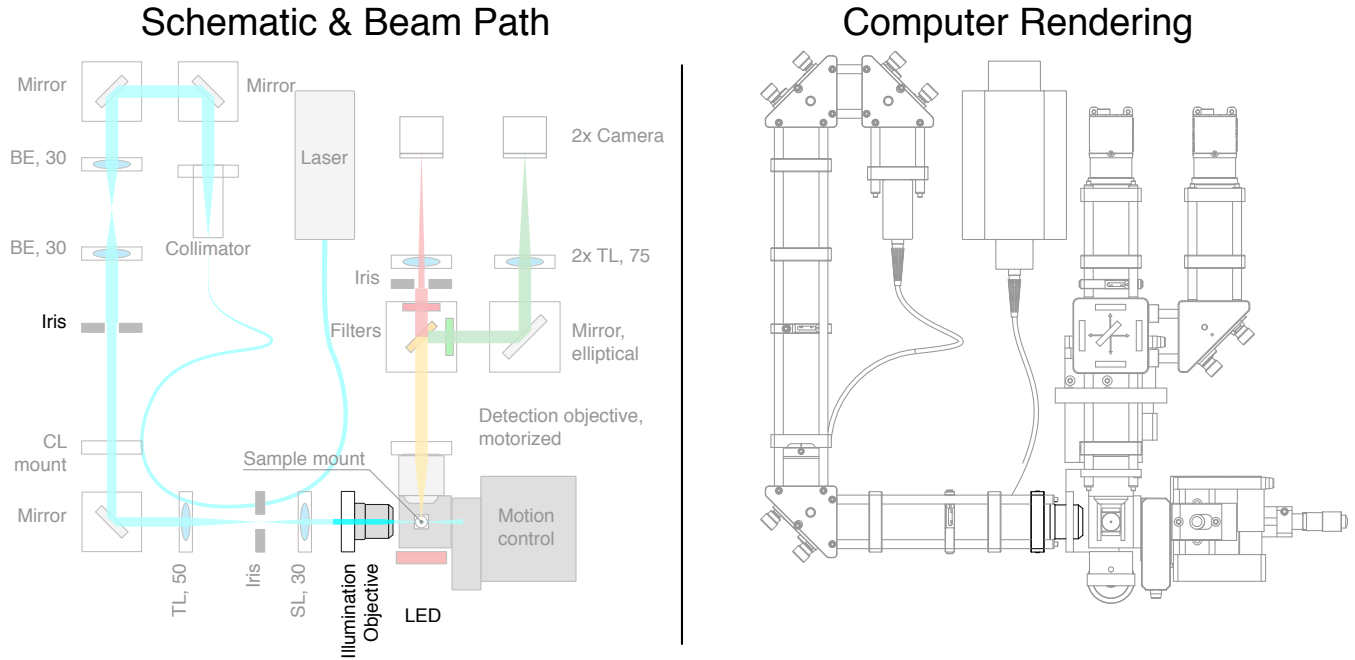

**Figure 4.**

- Illumination
  - Place the illumination objective such that its back focal plane is in the focal plane of the scan lens.
  - Slide the illumination arm into the corner connecting both arms of the SPIM.
- Align illumination and detection
  - Place a water-filled cuvette in the sample mount and remove the filters from the filter cube to image the scattered signal of the illumination beam.
  - Move the whole illumination arm until the waist of the Gaussian beam is in the centre of the camera's field of view. Make sure that the illumination arm is not tilted.
  - Adjust the alignment mirror to focus the image of the Gaussian beam onto the camera.

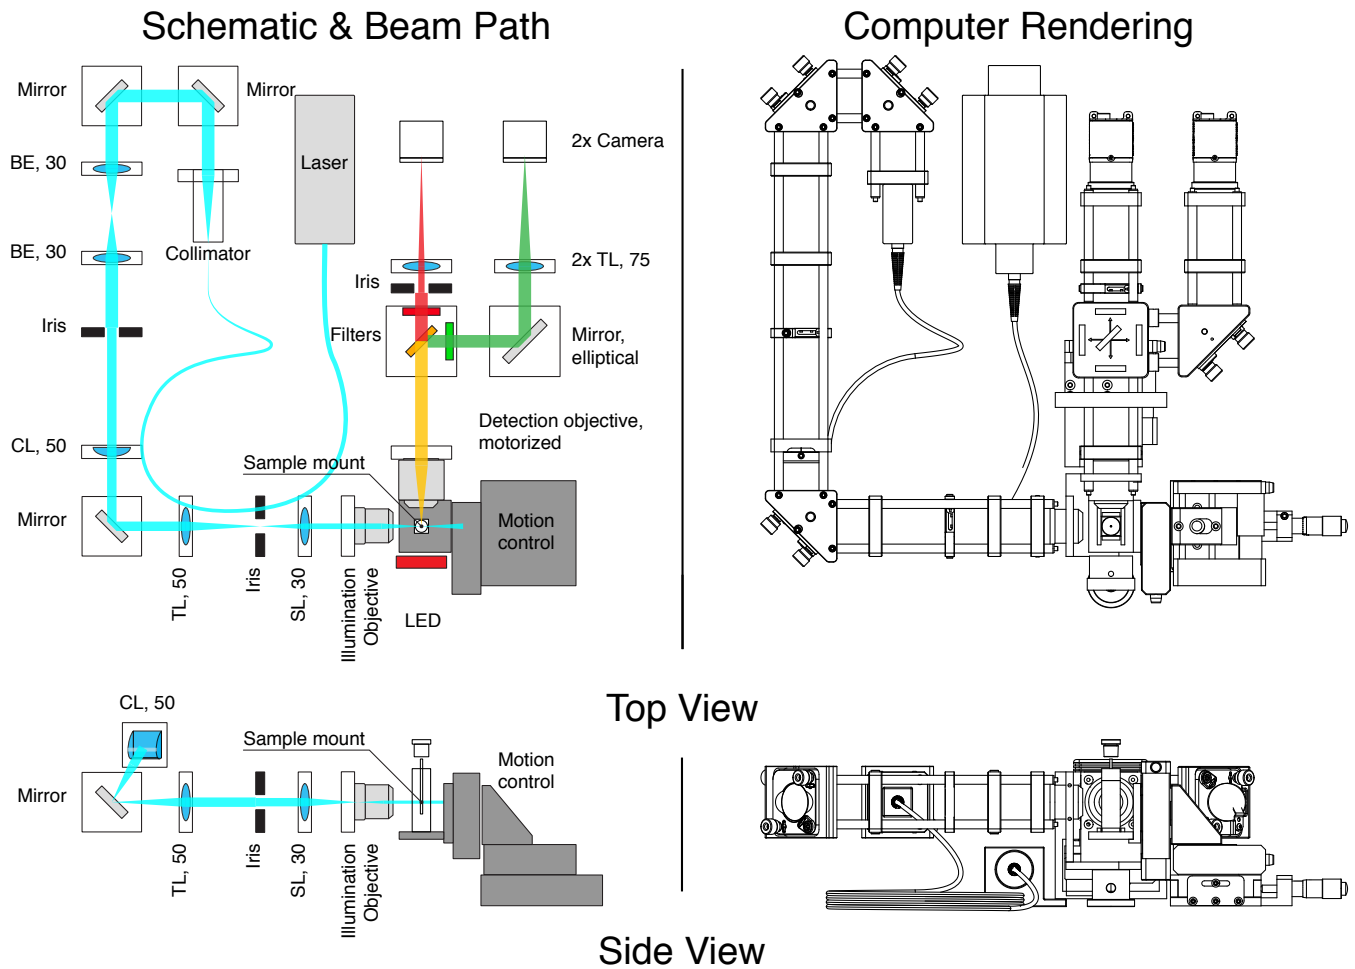

**Figure 5.**

- Create the light sheet
  - Place the cylindrical lens in its mount and move the mount until you get a sharp line on the mirror. Rotate the mount until the line is horizontal.
  - Additionally to the top view, a side view is shown in Figure 5.
- Fine-tune the alignment
  - Place the filters back in the filter cube and a sample of fluorescent beads in the cuvette.
  - Focus by adjusting the mirror.
  - Rotate the cylindrical lens to adjust a tilted light sheet.
  - If the light sheet is tilted in  $x$ -direction, the illumination and/or the detection arm are tilted.
  - Close the iris to crop the light sheet to the desired height.
  - Place the actual sample in the cuvette. Focus in the centre of the sample by adjusting the mirror.
  - Move the transmission camera to ensure that the focus of the transmission and the fluorescence image overlap and close the iris to get the desired depth of field.
- Calibrate the refocusing
  - Move to the front of the sample using the motorized  $z$ -stage. Adjust the focus by moving the motorized detection objective. Note the positions of both stages.
  - Move to the back of the sample and adjust the focus and note the positions of both stages.
  - The calibration curve for refocusing is acquired by linear interpolation between these two values.

**Table 1. List of parts.** Companies: Toptica (Toptica Photonics AG, Germany), Stemmer (Stemmer Imaging GmbH, Germany), Thorlabs (Thorlabs Inc, New Jersey, USA), Zeiss (Carl Zeiss AG, Germany), Chroma (Chroma Technology Corporation, Vermont, USA), Semrock (Semrock, Inc, New York, USA), PI (Physik Instrumente GmbH & Co. KG, Germany), Arduino (Arduino, Italy), APEM (APEM GmbH, Germany)

|                     | Part                                                    | Specifications              | Part No.             | Manufacturer | Amount |
|---------------------|---------------------------------------------------------|-----------------------------|----------------------|--------------|--------|
| Light sources       | Laser                                                   | 100 mW, 488 nm              | iBeam smart 488      | Toptica      | 1      |
|                     | Collimator                                              | 8 mm diameter               | Fibreout             | Toptica      | 1      |
|                     | LED                                                     | 635 nm                      | CCS TH-27/27-RD      | Stemmer      | 1      |
|                     | Power supply                                            | for LED                     | CCS PSB-1024V-WW     | Stemmer      | 1      |
| Illumination optics | Alignment mirror                                        | 25.4 mm, 400 to 750 nm      | BB1-E02              | Thorlabs     | 2      |
|                     | Lens                                                    | 30 mm, 350 to 700 nm        | LB1757-A             | Thorlabs     | 1      |
|                     | Lens                                                    | 30 mm, 350 to 700 nm        | LB1757-A             | Thorlabs     | 1      |
|                     | Cylindrical lens                                        | 50 mm, 350 to 700 nm        | LJ1695RM-A           | Thorlabs     | 1      |
|                     | Lightsheet mirror                                       | 25.4 mm, 400 to 750 nm      | BB1-E02              | Thorlabs     | 1      |
|                     | Scan lens                                               | 50 mm, 350 to 700 nm        | LB1471-A             | Thorlabs     | 1      |
|                     | Tube lens                                               | 30 mm, 350 to 700 nm        | LB1757-A             | Thorlabs     | 1      |
|                     | Illumination objective                                  | WD 4.4 mm                   | LSFM 5x/0.1          | Zeiss        | 1      |
| Detection optics    | Detection objective                                     | WD 7.3 mm                   | LD Epiplan 20x/0,40  | Zeiss        | 1      |
|                     | Dichroic                                                | 594 nm                      | zt 594 RDC           | Chroma       | 1      |
|                     | GFP bandpass                                            | 550/88 nm                   | 550/88 BrightLine HC | Semrock      | 1      |
|                     | Transmission longpass                                   | 594 nm                      | 594 LP Edge Basic    | Semrock      | 1      |
|                     | Alignment mirror                                        | elliptic, 400 to 750 nm     | BBE1-E02             | Thorlabs     | 1      |
|                     | Tube lens                                               | 75 mm, 350 to 700 nm        | LB1901-A             | Thorlabs     | 2      |
|                     | Camera                                                  | CMOS 1280x1024 px           | DCC3240M             | Thorlabs     | 2      |
| Motion control      | <i>x</i> -stage                                         | 13 mm range                 | MT1/M                | Thorlabs     | 1      |
|                     | <i>y</i> -motor                                         | 25 mm range                 | M112.1DG             | PI           | 1      |
|                     | <i>z</i> -motor                                         | 15 mm range                 | M111.1DG             | PI           | 1      |
|                     | Objective motor                                         | 15 mm range                 | M111.1DG             | PI           | 1      |
| Opto-mechanics      | Cuvette                                                 | 3500 $\mu$ l, fluorescence  | CV10Q3500FS          | Thorlabs     | 1      |
|                     | Breadboard                                              | 600 mm $\times$ 600 mm      | MB6060/M             | Thorlabs     | 1      |
|                     | Rod                                                     | 10 in, 6 mm                 | ER10                 | Thorlabs     | 4      |
|                     |                                                         | 6 in, 6 mm                  | ER6                  | Thorlabs     | 4      |
|                     |                                                         | 3 in, 6 mm                  | ER3                  | Thorlabs     | 12     |
|                     |                                                         | 2 in, 6 mm                  | ER2                  | Thorlabs     | 4      |
|                     |                                                         | 1 in, 6 mm                  | ER1                  | Thorlabs     | 4      |
|                     |                                                         | 0.5 in, 6 mm                | ER05                 | Thorlabs     | 4      |
|                     | Post                                                    | 50 mm                       | RS2P4M               | Thorlabs     | 7      |
|                     | Post                                                    | 25 mm                       | RS1P4M               | Thorlabs     | 1      |
|                     | Clamp                                                   |                             | CF125C/M             | Thorlabs     | 8      |
|                     | Cage plate                                              | 35 mm aperture              | CP03/M               | Thorlabs     | 7      |
|                     | Lens mount                                              |                             | CP08                 | Thorlabs     | 6      |
|                     | Rotational mount                                        | for cylindrical lens        | CRM1L/M              | Thorlabs     | 1      |
|                     | Mirror mount                                            | round                       | KCB1C/M              | Thorlabs     | 3      |
|                     | Mirror mount                                            | elliptic                    | KCB1E/M              | Thorlabs     | 1      |
|                     | Filter cube                                             |                             | DFM/M                | Thorlabs     | 1      |
|                     | Camera mount                                            | adaptor                     | SM1A9                | Thorlabs     | 2      |
|                     |                                                         | lens tube                   | SM1L20               | Thorlabs     | 2      |
|                     |                                                         | cage plate                  | CP12/M               | Thorlabs     | 2      |
|                     | Blank mount                                             | for collimator & objectives | CP01/M               | Thorlabs     | 3      |
|                     | Iris                                                    |                             | CP20S                | Thorlabs     | 3      |
| Control             | PC                                                      |                             | NUC5i5RYK            | Intel        | 1      |
|                     | Arduino                                                 |                             | Arduino MEGA 2560    | Arduino      | 1      |
|                     | Push button                                             |                             | AV0630C900           | APEM         | 7      |
| Custom made parts   | Adaptors to hold the cuvette                            |                             |                      |              | 1      |
|                     | Adaptors to mount the motorized detection objective     |                             |                      |              | 1      |
|                     | Corner pieces to connect illumination and detection arm |                             |                      |              | 1      |
|                     | Baseplate for push buttons                              |                             |                      |              | 1      |
